# Supplementary material
Source: publisher figshare collection journal article supplement (https://asha.figshare.com/ndownloader/files/39128540)
Supplement: Supplementary file 1 [file 39128540]

**Supplemental Material S1.** Post-hoc comparisons using Tukey’s honestly significant difference (HSD) test for the area and volume of the articulatory consonant distinctiveness space and classification methods. Mean differences are provided for each pairwise comparison.

| Variable     | Group         | Healthy | Asymptomatic | Mild-Moderate | Severe        |
|--------------|---------------|---------|--------------|---------------|---------------|
| Area         | Healthy       | —       | 0.13         | 0.10          | −0.14         |
|              | Asymptomatic  |         | —            | −0.03         | <b>−0.27</b>  |
|              | Mild–moderate |         |              | —             | <b>−0.24</b>  |
| Volume       | Healthy       | —       | 0.22         | 0.15          | −0.04         |
|              | Asymptomatic  |         | —            | −0.07         | −0.26         |
|              | Mild–moderate |         |              | —             | −0.20         |
| SVM accuracy | Healthy       | —       | 0.81         | −6.19         | <b>−17.91</b> |
|              | Asymptomatic  |         | —            | −7.00         | <b>−18.73</b> |
|              | Mild–moderate |         |              | —             | −11.72        |
| PM accuracy  | Healthy       | —       | 0.23         | −6.24         | <b>−14.07</b> |
|              | Asymptomatic  |         | —            | −6.47         | <b>−14.30</b> |
|              | Mild–moderate |         |              | —             | −7.83         |

*Note.* Mean differences that are statistically significant at the  $p < .05$  level are in bold. SVM = support vector machine; PM = Procrustes matching.
